# Supplementary material for: MCC950/CRID3 potently targets the NACHT domain of wild-type NLRP3 but not disease-associated mutants for inflammasome inhibition
Source: PLoS Biol. 2019 Sep 16;17(9):e3000354. doi: 10.1371/journal.pbio.3000354 (PMC6762198; doi:10.1371/journal.pbio.3000354)
Supplement: S5 Data — (XLSX) [file pbio.3000354.s009.xlsx]

## Sheet: data_Fig 6a
	time (days)	Nlrp3AL351P/+/CreT- (n=6)						Nlrp3L351P/+/CreT+ (n=6) PBS						Nlrp3L351P/+/CreT+ (n=6) MCC950
	0	100	100	100	100	100	100	100	100	100	100	100	100	100	100	100	100	100	100
	1	102.308	101.91	103.649	103.493	102.315	105.267	95.4681	99.3857	93.0556	94.6479	95.625	95.6848	97.0631	99.7606	94.4444	96.3081	97.7857	94.7134
	2	104.142	102.66	103.463	104.722	100.9	103.796	95.5423	95.5774	89.2361	92.3944	93.75	91.7448	95.5947	95.5715	92.1811	92.2343	97.5	92.9936
	3	106.805	101.433	97.0934	102.846	101.479	103.408	83.9524	81.8182	82.3611	83.4507	81.5	81.3008	85.022	83.1837	82.2359	83.3864	87.5	81.7834
	4	101.183	102.319	89.9814	96.2484	97.3633	103.641	75.3343	75.1228	73.5417	75.2817	73.5	73.0456	77.3128	76.0622	71.3306	74.4112	77.5714	74.8408
	5	100	102.319	84.4156	90.5563	95.2412	106.894								69.4195			69	66.051
	6	102.959	111.255	87.5696	97.2186	100	107.204
	7	105.207	115.007	91.8986	100.194	102.315	113.168
	8	108.757	116.78	95.5473	102.458	102.251	118.203
	9	113.55	124.352	102.165	109.12	106.817	120.527
	10	110.355	120.873	101.051	106.727	104.952	118.668

## Sheet: data_Fig 6b
	time (days)	Nlrp3L351P/+/CreT-(n=6)	Nlrp3L351P/+/CreT++ PBS (n=6)	Nlrp3L351P/+/CreT+ + MCC950 (n=6)
	4		1	1
	4		1	1
	4		1
	5		1	1
	5		1	1
	5		1	1
	5			1
	10	0
	10	0
	10	0
	10	0
	10	0
	10	0

## Sheet: data_Fig 6c
	Nlrp3L351P/+ CreT-		Nlrp3L351P/+ CreT+
	PBS	MCC950	PBS	MCC950
	0	0.802365	1.94024	2.1328
	0.696783	0.802365	2.21696	2.1328
	1.01938		1.23871	2.01189
	0.557094		2.60233	2.22078
	0.887278		2.06309	1.85499
	0		1.66656	1.76024
	0
	0.958313

## Sheet: data_Fig 6d
	Nlrp3L351P/+ CreT-				Nlrp3L351P/+ CreT+
	PBS		MCC950		PBS		MCC950
	2.41802		0	0	3.64424		3.94328
	0.995047		0	0	3.75561		3.74064
	0				3.8681		3.85746
	0				4.44799		3.95119
	2.44619				4.32956	4.20738	4.26743	4.16759
	0				4.1523	4.13141	4.17635	4.11293
	0	0
	0	0

## Sheet: data_Fig 6e
	Nlrp3L351P/+ CreT-				Nlrp3L351P/+ CreT+
	PBS		MCC950		PBS		MCC950
	0.767368		0	0	1.97962		2.11584
	1.73805		-0.37378	-0.37378	2.34968		2.53729
	1.0524				1.97406		2.91372
	1.15265				2.84058		2.824
	1.71352				2.7578	2.67152	3.16505	3.09863
	0.500769				2.19137	2.15566	2.00026	1.97824
	1.12564	1.24051
	1.53209	1.51964

## Sheet: data_Fig 6f
	time (days)	Nlrp3A350V/+/CreT- (n=6)						Nlrp3350V/+/CreT+ (n=6) PBS						Nlrp3350V/+/CreT+ (n=7) MCC950
	0	100	100	100	100	100	100	100	100	100	100	100	100	100	100	100	100	100	100	100
	9	108.889	104	108.75	100.54	112.921	103.264	80.5263	80.5263	95	89.526	89.9668	84.8881	87.4286	86.7052	82.0513	89.7297	92.6566	95.0683	93.4722
	12	113.889	106.857	111.875	104.865	113.146	111.111	80.3158	77.8947	90.625	83.9672	83.7209	83.0224	84.2857	81.5029	78.2051	100.54	101.512	92.6916	94.6528
	15	116.667	112	111.25	103.784	117.416	108.056	81.4737	74.6316	88.625	85.1375	85.0498	77.7363	85.1429	83.6416	83.3333	95.4054	96.3823	92.6916	94.4444
	18	116.667	113.143	115	106.487	121.348	113.194	76.8421	75.7895	91.875	85.4301	84.3854	75.5597	90.8571	84.3931	87.8205	94.0541	99.3521	95.0683	99.3056
	21	112.778	110	116.562	104.865	122.416	116.319	75.2632	74.2105	86.875	85.8982	80.4651	73.3209	86.2857	79.7688	85.2564	94.5946	100.108	93.9988	96.5972
	24	110.667	110.457	115.188	104.919	121.348	114.931	76.6842	75.6316	85.125	80.3979	82.4585	78.3582	85.4286	78.6127	89.4872	94.7027	89.6328	90.3149	94.6528
	27	111.111	113.143	116.875	105.405	126.685	114.167	80	75.2632	83.125	83.4406	84.4518	78.4826	89.7143	78.6127	92.3077	97.2973	89.6328	97.3856	96.25

## Sheet: data_Fig 6g
	Nlrp3A350V/+ CreT-		Nlrp3A350V/+ CreT+
	PBS	MCC950	PBS	MCC950
	0	0	3.04624	0
	0	0	2.21096	0
	0	0	1.50746	0
	0	0	2.74747	2.5657
	0	0	2.52832	2.3229
	0		2.40913	0
	0		3.10917	0
	0			3.56217

## Sheet: data_Fig 6h
	Nlrp3A350V/+ CreT-		Nlrp3A350V/+ CreT+
	PBS	MCC950	PBS	MCC950
	0	0	1.79212	0
	0	0	1.49163	0
	0	0	1.41627	0
	0	0	0.853697	0.802668
	0.180258	0	1.95821	0.940312
	0		1.93317	2.55537
	0.367457		2.35474	1.95445
	0			2.05198
