# Supplementary material for: MCC950/CRID3 potently targets the NACHT domain of wild-type NLRP3 but not disease-associated mutants for inflammasome inhibition
Source: PLoS Biol. 2019 Sep 16;17(9):e3000354. doi: 10.1371/journal.pbio.3000354 (PMC6762198; doi:10.1371/journal.pbio.3000354)
Supplement: S7 Data — (XLSX) [file pbio.3000354.s011.xlsx]

## Sheet: data_Sup Fig 1a
	days (post-tamoxifen)	Nlrp3L351P/+CreT-												Nlrp3L351P/+CreT+
	0	15.1064	31.7836	10.9485	13.72	15.1064	20.6574	16.4934	30.391	22.0464	17.8809	19.2689	17.8809	19.2689	22.0464	16.4934	10.9485	15.1064	12.334	17.8809	19.2689	12.334	15.1064	26.2164	24.8259
	3	34.5702	12.334	23.4359	12.334	34.5702	15.1064	13.72	24.8259	30.391	16.4934	17.8809	24.8259	70.9804	127.664	48.5336	49.9327	72.3876	221.504	172.152	58.3381	63.9519	66.7618	79.4314	89.3139

## Sheet: data_Sup Fig 1b
	days (post-tamoxifen)	Nlrp3L351P/+CreT-												Nlrp3L351P/+CreT+
	0	6.8545	0	0	6.8545	0	0	0	6.8545	345.961	0	0	0	0	0	0	0	0	0	0	0	0	0	0	0
	3	267.611	6.8545	172.677	345.961	0	0	0	6.8545	345.961	0	6.8545	0	13050.3	13455.4	13797.1	7378.49	10596.7	19451.4	31309.7	23059	23619.5	14149.8	21372.4	7847.88

## Sheet: data_Sup Fig 1c
	days (post-tamoxifen)	Nlrp3L351P/+CreT-												Nlrp3L351P/+CreT+
	0	0	0	2.77638	0	0	0	0	0	2.77638	0	0	16.0729	0	0	0	0	0	0	0	0	0	0	0	34.6048
	3	0	0	5.703	1.15651	13.5944	0	0	47.6225	23.2428	0	0	0	295.304	1257.13	1073.75	1192.36	1263.45	1012.81	1467.99	726.241	1011.37	689.444	552.803	2395.76

## Sheet: data_Sup Fig 1d
	days (post-tamoxifen)	Nlrp3A350V/+CreT-														Nlrp3A350V/+CreT+
	0	22.0464	41.5456	30.391	34.5702	17.8809	17.8809	13.72	15.1064	8.17914	17.8809	16.4934	10.9485	5.41177	17.8809	11.21	19.2689	27.6075	44.3393	6.7952	13.72	19.2689	20.6574	4.02884	12.334	9.56358	19.2689	19.2689	16.4934
	3	24.8259	20.6574	89.3139	17.8809	22.0464	22.0464	17.8809	16.4934	19.2689	17.8809	15.1064	17.8809	15.1064	19.2689	52.7325	82.3	49.9327	33.1766	13.72	23.4359	47.135	33.1766	30.391	26.2164	23.4359	20.6574	23.4359	24.8259

## Sheet: data_Sup Fig 1e
	days (post-tamoxifen)	Nlrp3A350V/+CreT-														Nlrp3A350V/+CreT+
	0	0	0	0	0	0	172.677	0	0	0	6.8545	0	0	6.8545	0	0	0	0	0	0	0	0	0	0	0	0	0	0	6.8545
	3	0	0	0	0	0	267.611	0	0	6.8545	172.677	0	0	6.8545	6.8545	381.465	6.8545	267.611	0	0	0	172.677	172.677	1153.08	1395.35	6.8545	478.267	644.427	919.317

## Sheet: data_Sup Fig 1f
	days (post-tamoxifen)	Nlrp3A350V/+CreT-														Nlrp3A350V/+CreT+
	0	0	18.5021	5.703	0	0	13.5944	0	0	0	0	0	0	0	0	0	0	27.8593	0	0	16.0729	0	0	0	0	0	0	0	0
	3	5.703	0	141.45	0	0	8.43565	5.703	0	0	0	0	2.77638	0	16.0729	271.697	426	572.12	106	70.3919	45.4889	60.1843	8.43565	16.0729	27.8593	5.703	13.5944	2.77638	0
